# Supplementary material for: Structural regulation of NHC-protected copper(i) clusters through substitution for photoluminescence enhancement
Source: Royal Society of Chemistry journal article supplement (doi:10.1039/d4qi00656a), 2024-01-01
Supplement: d4qi00656a1.pdf [file d4qi00656a1.pdf]

## Electronic Supplementary Information

### Structural regulation of NHC-protected Copper(I) clusters through substituent effect for photoluminescence enhancement

Yan-Yan Yang,<sup>a</sup> Rui-Chen Hao,<sup>a</sup> Qing-Qing Wu,<sup>b</sup> Peng Luo,<sup>\*a,b</sup> Jun Xu,<sup>\*a</sup> Xi-Yan Dong<sup>\*a,b</sup>  
and Chuan-Xiang Zhang<sup>a</sup>

<sup>a</sup> College of Chemistry and Chemical Engineering, Henan Polytechnic University,  
Jiaozuo 454003, China

<sup>b</sup> College of Chemistry, Zhengzhou University, Zhengzhou 450001, China

## Synthesis of benzimidazole precursors

### Synthesis of 1-(2-trifluoromethoxybenzyl)-3-picolyl-benzimidazolium chloride ( $\text{NHC}^{\text{PyOF}} \cdot \text{HCl}$ )

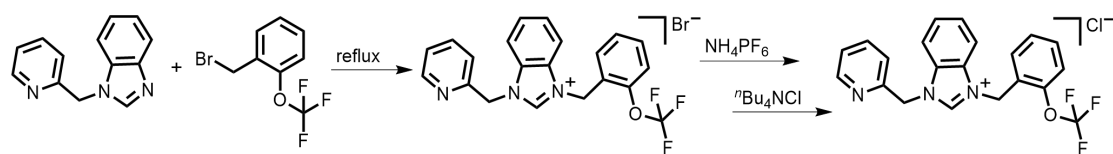

**Scheme S1.** Synthetic procedure of  $\text{NHC}^{\text{PyOF}} \cdot \text{HCl}$ .

$\text{NHC}^{\text{PyOF}} \cdot \text{HBr}$  was synthesized based on the modified methods in previous literature.<sup>S1</sup> N-picolylbenzimidazole (2.1 g, 10 mmol) and 2-(trifluoromethoxy)benzyl bromide (7.17 g, 30 mmol) were mixed together in 100 mL of toluene. The mixture was refluxed overnight, then the white solid was isolated and washed with several portions of ethyl acetate to get  $\text{NHC}^{\text{PyOF}} \cdot \text{HBr}$  (3.75 g, 8 mmol). Yield 84%.

$\text{NHC}^{\text{PyOF}} \cdot \text{HPF}_6$ : In a flask,  $\text{NHC}^{\text{PyOF}} \cdot \text{HBr}$  (448 mg, 1 mmol) was dissolved in 3 mL methanol, and  $\text{NH}_4\text{PF}_6$  (489 mg, 3 mmol) aqueous solution was added dropwise. The precipitate was formed during 12 h. The reaction mixture was filtered, washed thoroughly with water/methanol, and dried *in vacuo*, which was used for the next reaction without further purification.

$\text{NHC}^{\text{PyOF}} \cdot \text{HCl}$ : In a flask, the above  $\text{NHC}^{\text{PyOF}} \cdot \text{HPF}_6$  was dissolved in 3 mL acetonitrile, and  $n\text{Bu}_4\text{NCl}$  (834 mg, 3 mmol) in acetonitrile was added dropwise. The precipitate was formed during 12 h. The reaction mixture was filtered, washed thoroughly with acetonitrile, and dried *in vacuo*. The compound was further purified by recrystallization from methanol/diethyl ether to get off-white solid as  $\text{NHC}^{\text{PyOF}} \cdot \text{HCl}$  (330 mg, 0.82 mmol). Yield 82% (two-step overall yield).  $^1\text{H}$  NMR ( $\text{DMSO}-d_6$ ): 9.97 (s, 1H), 8.50-8.49 (d, 1H), 8.02-8.01 (d, 1H), 7.93-7.90 (m, 2H), 7.79-7.66 (m, 6H), 7.39-7.29 (m, 2H), 6.05-5.99 (d, 4H).

### Synthesis of bis-(2-picolyl-benzimidazolyl)methane chloride ( $\text{bisNHC}^{\text{Me}} \cdot (\text{HCl})_2$ )

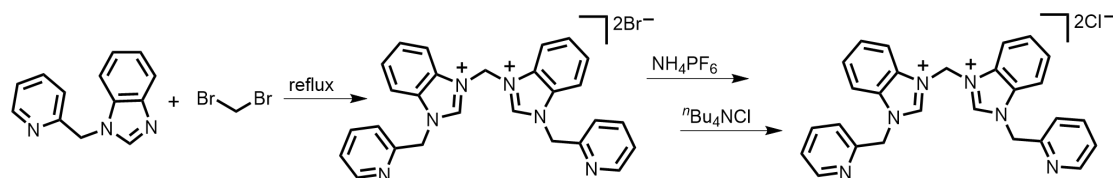

**Scheme S2.** Synthetic procedure of  $\text{bisNHC}^{\text{Me}} \cdot (\text{HCl})_2$ .

$\text{bisNHC}^{\text{Me}} \cdot (\text{HBr})_2$  was synthesized based on the modified methods in previous literature.<sup>S1</sup> N-picolylbenzimidazole (2.1 g, 10 mmol) and dibromomethane (0.87 g, 5 mmol) were mixed together in 100 mL of toluene. The mixture was refluxed overnight, then the white solid was isolated and washed with several portions of ethyl acetate get  $\text{bisNHC}^{\text{Me}} \cdot (\text{HBr})_2$  (3.85 g, 0.65 mmol). Yield 65%.

**bisNHC<sup>Me</sup>•(HPF<sub>6</sub>)<sub>2</sub>**: In a flask, **bisNHC<sup>Me</sup>•(HBr)<sub>2</sub>** (591 mg, 1 mmol) was dissolved in 3 mL methanol, and NH<sub>4</sub>PF<sub>6</sub> (489 mg, 3 mmol) aqueous solution was added dropwise. The precipitate was formed during 12 h. The reaction mixture was filtered, washed thoroughly with water/methanol, and dried *in vacuo*, which was used for the next reaction without further purification.

**bisNHC<sup>Me</sup>•(HCl)<sub>2</sub>**: In a flask, the above **bisNHC<sup>Me</sup>•(HPF<sub>6</sub>)<sub>2</sub>** was dissolved in 3 mL acetonitrile, and <sup>n</sup>Bu<sub>4</sub>NCl (834 mg, 3 mmol) in acetonitrile was added dropwise. The precipitate was formed during 12 h. The reaction mixture was filtered, washed thoroughly with acetonitrile, and dried *in vacuo*. The compound was further purified by recrystallization from methanol/diethyl ether to get off-white solid as **bisNHC<sup>Me</sup>•(HCl)<sub>2</sub>** (413 mg, 0.82 mmol). Yield 82% (two-step overall yield). <sup>1</sup>H NMR (DMSO-*d*<sub>6</sub>): 10.63 (s, 2H), 8.46 (d, 2H), 8.40-8.38 (d, 2H), 8.05-7.39 (m, 14H), 6.04 (s, 4H).

### Synthesis of 1, 3-bis-picolyl-benzimidazolium chloride (NHC<sup>Py2</sup>•HCl)

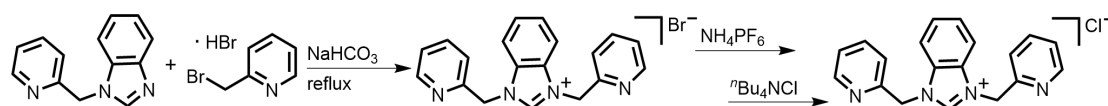

**Scheme 3.** Synthetic procedure of NHC<sup>Py2</sup>•HCl.

**NHC<sup>Py2</sup>•HBr** was synthesized based on the modified methods in previous literature.<sup>S2</sup> In a Schlenk flask, N-picolylbenzimidazole (2.1 g, 10 mmol) and 2-(bromomethyl)pyridine hydrobromide (278 mg, 1.1 mmol) were dissolved in 20 mL CH<sub>3</sub>CN under an argon atmosphere. The mixture was stirred at room temperature for 10 min, and then NaHCO<sub>3</sub> (168 mg, 2 mmol) was added in one portion. The reaction mixture was refluxed for 48 h, and then cooled to room temperature. The solvent was removed *in vacuo* and then DCM was added to get brown suspension, which was filtered to collect the liquid part. The solvent was concentrated *in vacuo*, followed by recrystallization from CH<sub>2</sub>Cl<sub>2</sub>/EtOAc to afford a light brown solid as **NHC<sup>Py2</sup>•HBr** (362 mg, 0.95 mmol). Yield 95%.

**NHC<sup>Py2</sup>•HPF<sub>6</sub>**: In a flask, **NHC<sup>Py2</sup>•HBr** (381 mg, 1 mmol) was dissolved in 3 mL methanol, and NH<sub>4</sub>PF<sub>6</sub> (489 mg, 3 mmol) aqueous solution was added dropwise. The precipitate was formed during 12 h. The reaction mixture was filtered, washed thoroughly with water/methanol, and dried *in vacuo*, which was used for the next reaction without further purification.

**NHC<sup>Py2</sup>•HCl**: In a flask, the above **NHC<sup>Py2</sup>•HPF<sub>6</sub>** was dissolved in 3 mL acetonitrile, and <sup>n</sup>Bu<sub>4</sub>NCl (834 mg, 3 mmol) in acetonitrile was added dropwise. The precipitate was formed during 12 h. The reaction mixture was filtered, washed thoroughly with acetonitrile, and dried *in vacuo*. The compound was further purified by recrystallization from methanol/diethyl ether to get off-white solid as **NHC<sup>Py2</sup>•HCl** (275 mg, 0.82 mmol). Yield 82% (two-step overall yield). <sup>1</sup>H NMR (DMSO-*d*<sub>6</sub>): 10.63 (s, 2H), 8.46 (d, 2H), 8.40-8.38 (d, 2H), 8.05-7.39 (m, 14H), 6.04 (s, 4H).

## Measurements

$^1\text{H}$  NMR spectra were recorded on a Bruker DRX spectrometer operating at 600 MHz. Electrospray ionization mass spectrometry (ESI-MS) measurements were recorded on a SCIEX X500R QTOF spectrometer. Elemental analysis measurements (H, C, and N) were conducted with an Elementar UNICUBE elemental analyzer under CHNS mode. Powder X-ray diffraction (PXRD) was performed on a Rigaku D/Max-2500PC X-ray diffractometer with a Cu sealed tub ( $\lambda = 1.54178 \text{ \AA}$ ). UV-Vis absorption spectra were recorded using a Hitachi UH4150 UV-visible spectrophotometer. Emission spectra were recorded with an Edinburgh FLS 980 fluorescence spectrometer. Luminescence lifetime was measured on an Edinburgh FLS 1000 fluorescence spectrometer equipped with a 355 nm laser operating in time-correlated single-photon counting mode (TCSPC) with a resolution time of 340  $\mu\text{s}$ . The photoluminescence quantum efficiency was measured in the range of 400-950 nm using an integrating sphere on a HAMAMATSU Quantaaurus-QY spectrofluorometer. Fourier transform infrared (FT-IR, Thermo., NEXUS FT-IR) spectra were recorded as KBr pellets at a resolution of  $4 \text{ cm}^{-1}$  to observe the functional groups.

## Single-crystal X-ray diffraction analyses

Single-crystal X-ray diffraction (SCXRD) measurements of clusters were performed on a Rigaku XtaLAB Pro diffractometer using Cu  $K\alpha$  radiation ( $\lambda = 1.54184 \text{ \AA}$ ) and Mo  $K\alpha$  ( $\lambda = 0.71073$ ). Data collection and reduction were performed using the program *CrysAlisPro*.<sup>53</sup> All the structures were solved with direct methods (*SHELXS*) and refined by full-matrix least squares on  $F^2$  using *OLEX2*, which utilizes the *SHELXL-2015* module.<sup>54-56</sup> All atoms were refined anisotropically, and hydrogen atoms were placed in calculated positions with idealized geometries and assigned fixed isotropic displacement parameters. Detailed information about the X-ray crystal data, intensity collection procedure, refinement results and selected bond lengths for all cluster compounds were summarized in the Supporting Information Table S4-S9.

## Density Functional Theory (DFT) calculations

The Density Functional Theory (DFT) and Time-Dependent Density Functional Theory (TDDFT) calculations were performed with Gaussian 16 under the Perdew–Burke–Ernzerhof (PBE)

exchange-correlation functional using def2SVP core pseudopotential for all atoms.<sup>57-58</sup> The single-crystal structure was chosen as the initial guess for ground-state optimization, and all reported stationary points were verified as true minima by the absence of negative eigenvalues in the vibrational frequency analysis. The UV–Vis and IGMH analysis were conducted by Multiwfn program.<sup>59</sup>

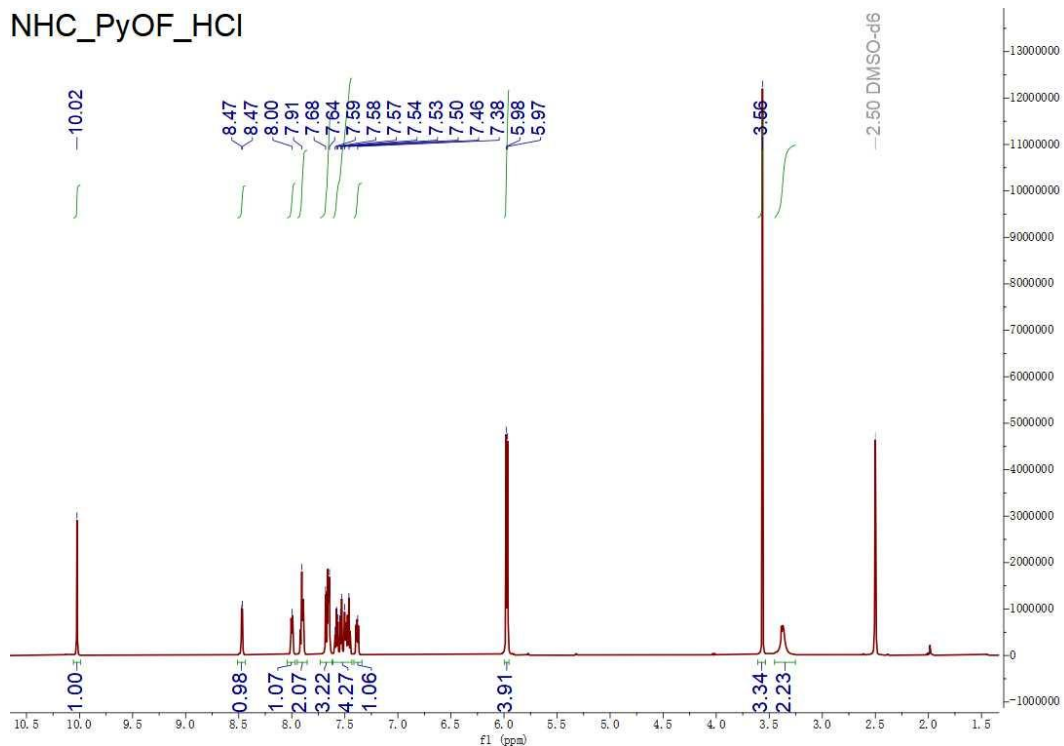

Figure S1.  $^1\text{H}$  NMR of  $\text{NHC}^{\text{PyOF}}\bullet\text{HCl}$  in  $\text{DMSO-}d_6$ .

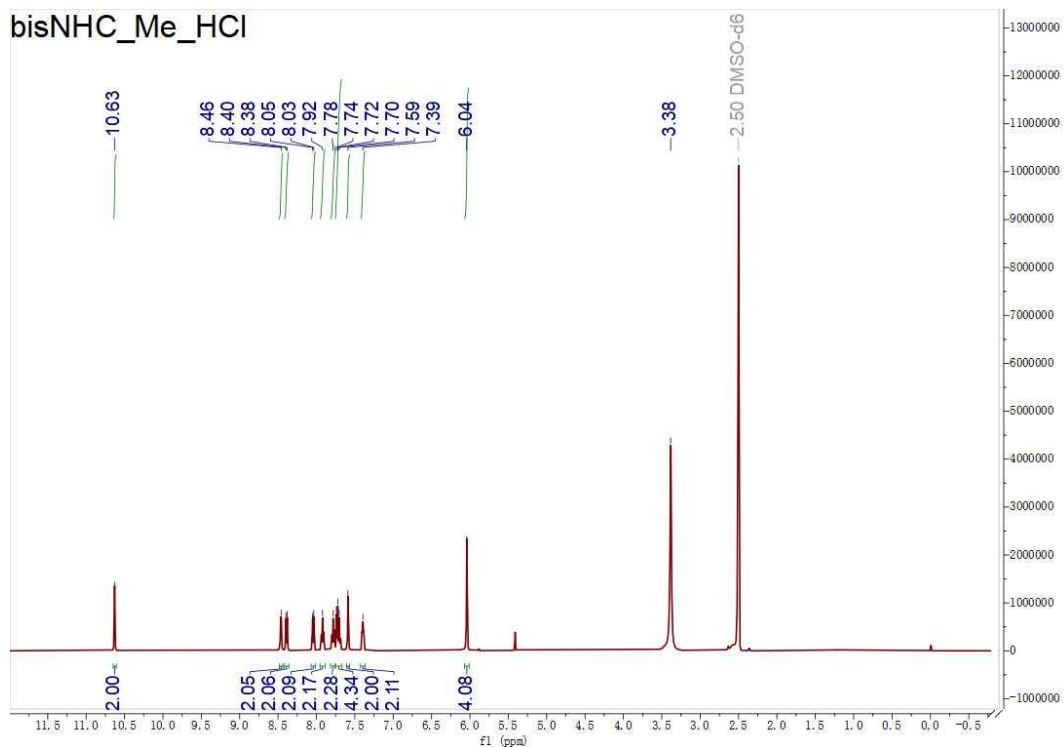

Figure S2.  $^1\text{H}$  NMR of  $\text{bisNHC}^{\text{Me}}\bullet(\text{HCl})_2$  in  $\text{DMSO-}d_6$ .

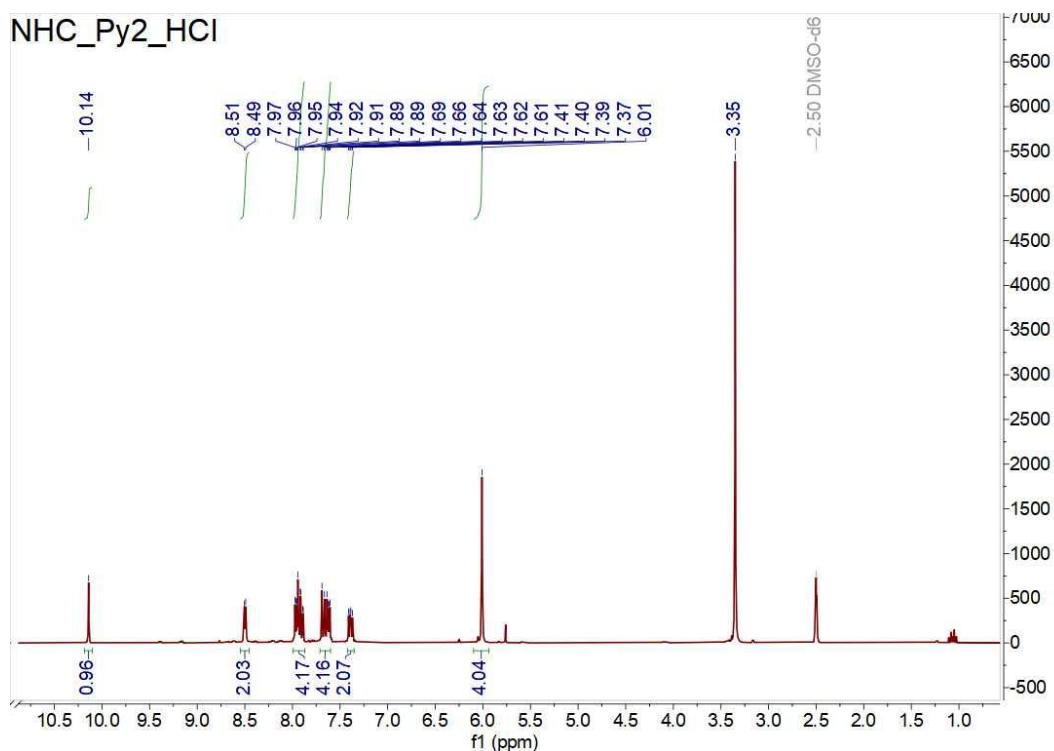

**Figure S3.**  $^1\text{H}$  NMR of  $\text{NHC}^{\text{Py}2}\cdot\text{HCl}$  in  $\text{DMSO-}d_6$ .

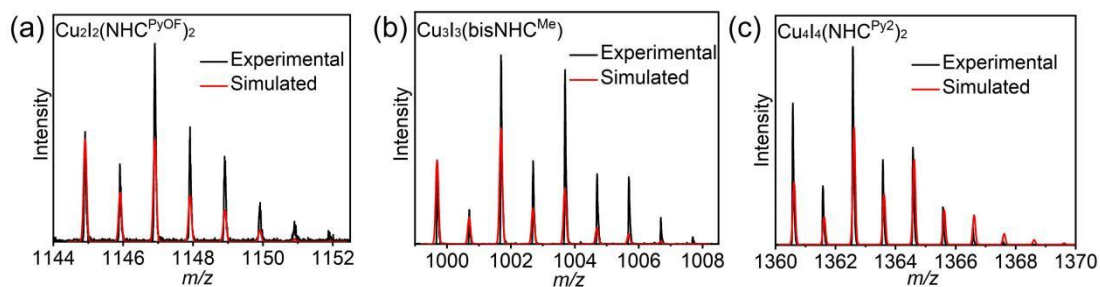

**Figure S4.** ESI-MS spectra for (a)  $\text{Cu}_2\text{I}_2(\text{NHC}^{\text{PyOF}})_2$ ; (b)  $\text{Cu}_3\text{I}_3(\text{bisNHC}^{\text{Me}})$  and (c)  $\text{Cu}_4\text{I}_4(\text{NHC}^{\text{Py}2})_2$  clusters.  $[\text{Cu}_2\text{I}_2\text{C}_{42}\text{H}_{33}\text{N}_6\text{O}_2\text{F}_6]^+$ :  $m/z = 1146.8427$  (calcd. 1146.8587);  $[\text{Cu}_3\text{I}_3\text{C}_{27}\text{H}_{23}\text{N}_6]^+$ :  $m/z = 1001.6591$  (calcd. 1001.6547);  $[\text{Cu}_4\text{I}_4\text{C}_{38}\text{H}_{33}\text{N}_8]^+$ :  $m/z = 1362.6048$  (calad. 1362.6180).

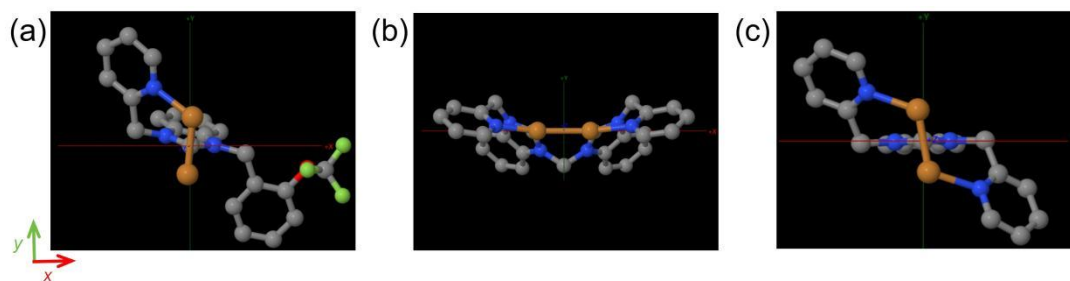

**Figure S5.**  $\text{Cu}_2$  motifs in  $z$ -axis direction for (a)  $\text{Cu}_2\text{NHC}^{\text{PyOF}}$  extracted from  $\text{Cu}_2\text{I}_2(\text{NHC}^{\text{PyOF}})_2$ ; (b)  $\text{Cu}_2\text{bisNHC}^{\text{Me}}$  extracted from  $\text{Cu}_3\text{I}_3(\text{bisNHC}^{\text{Me}})$ ; and (c)  $\text{Cu}_2\text{NHC}^{\text{Py}2}$  extracted from  $\text{Cu}_4\text{I}_4(\text{NHC}^{\text{Py}2})_2$ .

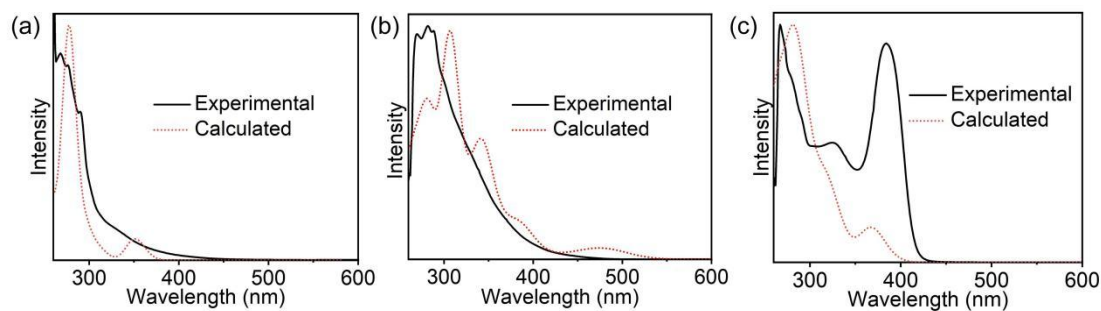

**Figure S6.** Experimental (black solid line) and calculated (red dotted line) UV-Vis absorption spectra of NHC-protected Cu(I) clusters of (a)  $\text{Cu}_2\text{I}_2(\text{NHC}^{\text{PyOF}})_2$ ; (b)  $\text{Cu}_3\text{I}_3(\text{bisNHC}^{\text{Me}})$ ; and (c)  $\text{Cu}_4\text{I}_4(\text{NHC}^{\text{Py}_2})_2$ .

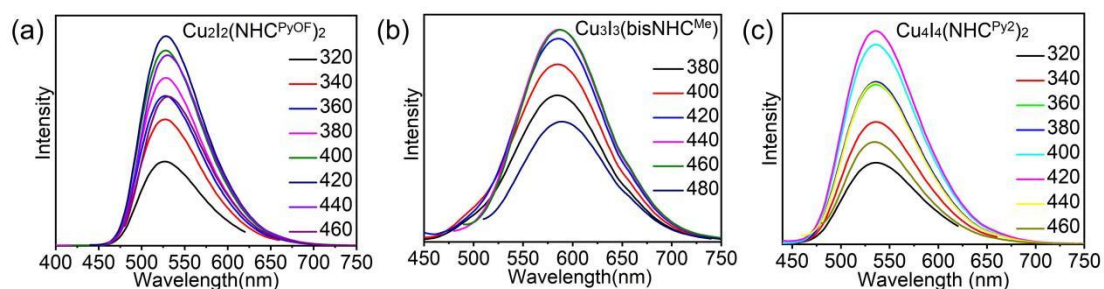

**Figure S7.** Emission spectra of (a)  $\text{Cu}_2\text{I}_2(\text{NHC}^{\text{PyOF}})_2$ ; (b)  $\text{Cu}_3\text{I}_3(\text{bisNHC}^{\text{Me}})$ ; and (c)  $\text{Cu}_4\text{I}_4(\text{NHC}^{\text{Py}_2})_2$  excited at variable excitation wavelength in solid.

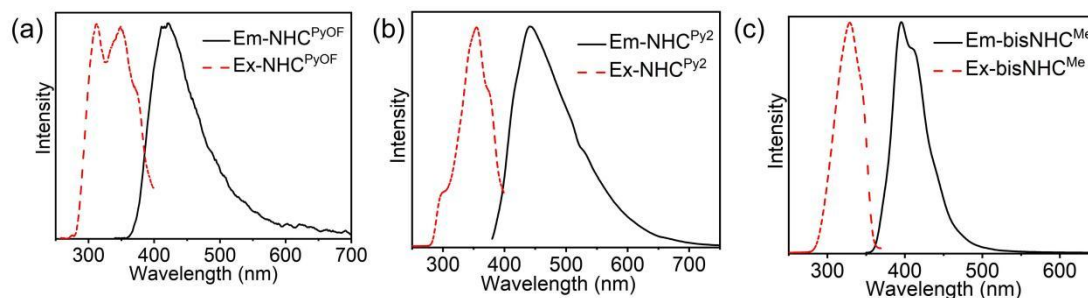

**Figure S8.** Emission (black solid line) and excitation spectra (red dotted line) of benzimidazole precursors (a)  $\text{NHC}^{\text{PyOF}}\cdot\text{HCl}$ ; (b)  $\text{bisNHC}^{\text{Me}}\cdot(\text{HCl})_2$ ; and (c)  $\text{NHC}^{\text{Py}_2}\cdot\text{HCl}$  in *N,N*-dimethylformamide at room temperature. The sample concentrations were  $\text{NHC}^{\text{PyOF}}\cdot\text{HCl}$  in  $1.7 \times 10^{-5}$  M,  $\text{bisNHC}^{\text{Me}}\cdot(\text{HCl})_2$  in  $2.9 \times 10^{-5}$  M and  $\text{NHC}^{\text{Py}_2}\cdot\text{HCl}$  in  $3.3 \times 10^{-5}$  M, respectively.



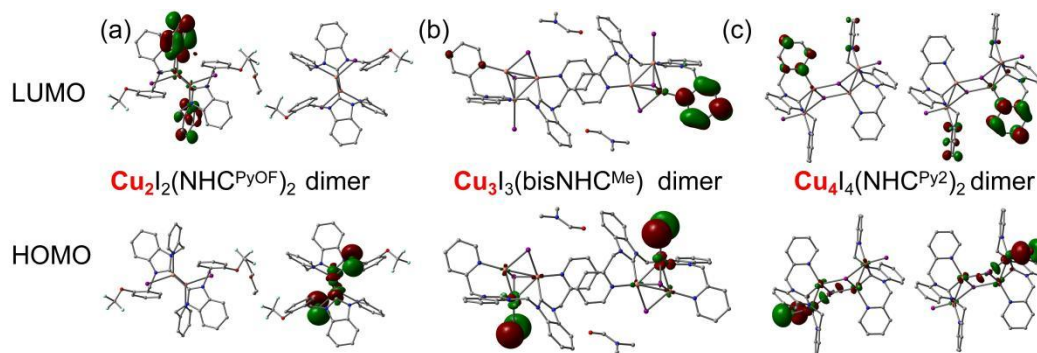

**Figure S9.** The frontier molecular orbitals (isovalue = 0.04) of dimer of NHC-protected Cu(I) clusters (a)  $\text{Cu}_2\text{I}_2(\text{NHC}^{\text{PyOF}})_2$  dimer; (b)  $\text{Cu}_3\text{I}_3(\text{bisNHC}^{\text{Me}})$  dimer; and (c)  $\text{Cu}_4\text{I}_4(\text{NHC}^{\text{Py}2})_2$  dimer. The hydrogen atoms were hidden for the sake of viewing.

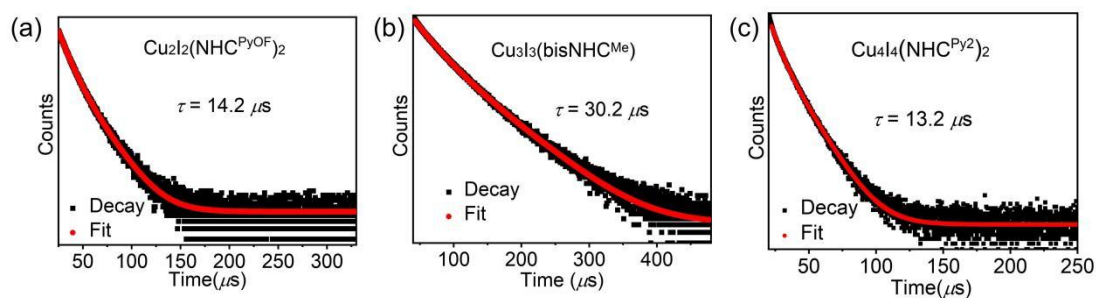

**Figure S10.** Lifetimes at room temperature for (a)  $\text{Cu}_2\text{I}_2(\text{NHC}^{\text{PyOF}})_2$ ; (b)  $\text{Cu}_3\text{I}_3(\text{bisNHC}^{\text{Me}})$ ; and (c)  $\text{Cu}_4\text{I}_4(\text{NHC}^{\text{Py}2})_2$ .

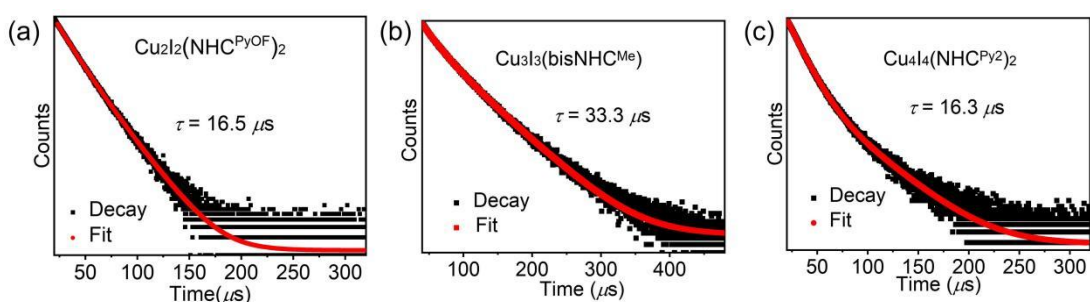

**Figure S11.** Lifetimes at 77 K for (a)  $\text{Cu}_2\text{I}_2(\text{NHC}^{\text{PyOF}})_2$ ; (b)  $\text{Cu}_3\text{I}_3(\text{bisNHC}^{\text{Me}})$ ; and (c)  $\text{Cu}_4\text{I}_4(\text{NHC}^{\text{Py}2})_2$ .

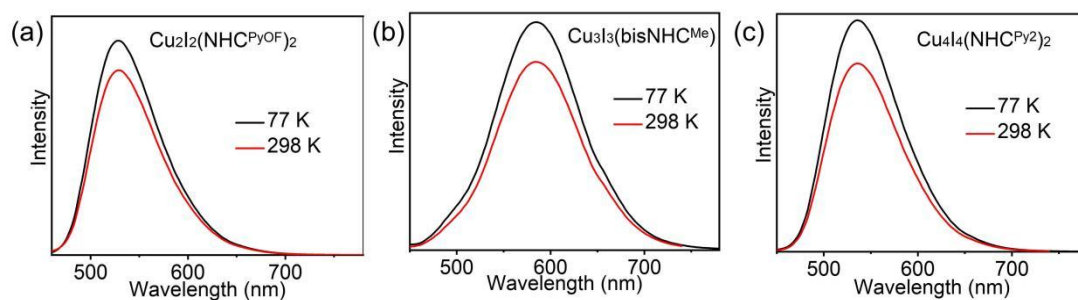

**Figure S12.** Emission spectra in solid at 77 K (black solid line) and 298 K (red solid line) for (a)  $\text{Cu}_2\text{I}_2(\text{NHC}^{\text{PyOF}})_2$ ; (b)  $\text{Cu}_3\text{I}_3(\text{bisNHC}^{\text{Me}})$ ; and (c)  $\text{Cu}_4\text{I}_4(\text{NHC}^{\text{Py}_2})_2$ .

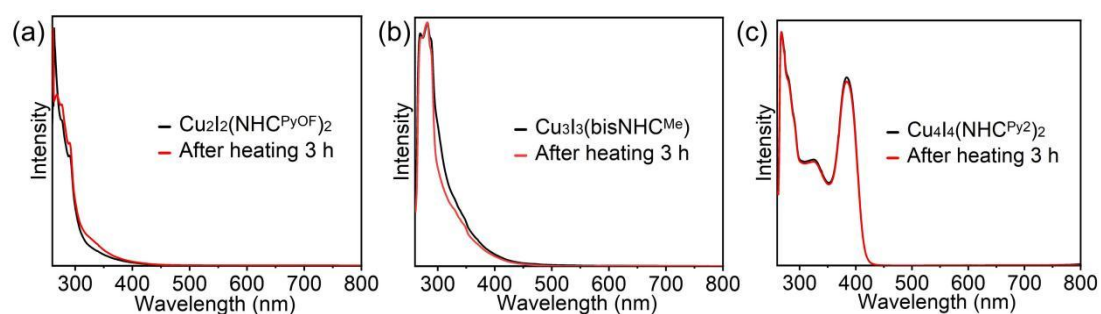

**Figure S13.** UV-Vis absorption spectra of the NHC-protected Cu(I) clusters in *N,N*-dimethylformamide before and after aging at 100 °C for 3 h: (a)  $\text{Cu}_2\text{I}_2(\text{NHC}^{\text{PyOF}})_2$ ,  $2.9 \times 10^{-5}$  M; (b)  $\text{Cu}_3\text{I}_3(\text{bisNHC}^{\text{Me}})$ ,  $3.8 \times 10^{-5}$  M; and (c)  $\text{Cu}_4\text{I}_4(\text{NHC}^{\text{Py}_2})_2$ ,  $4.5 \times 10^{-5}$  M.

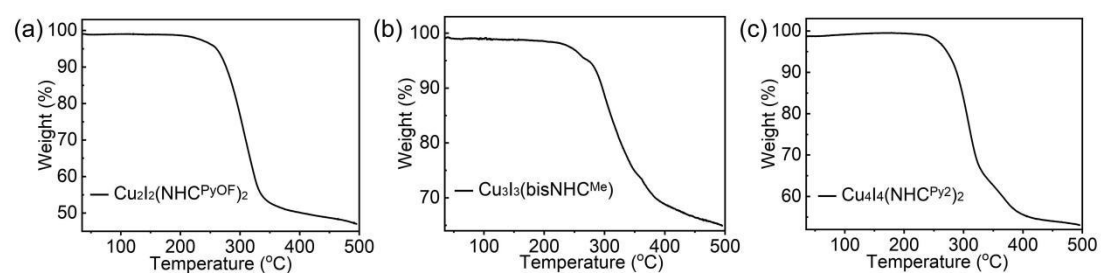

**Figure S14.** Thermogravimetric analysis (TGA) of (a)  $\text{Cu}_2\text{I}_2(\text{NHC}^{\text{PyOF}})_2$ ; (b)  $\text{Cu}_3\text{I}_3(\text{bisNHC}^{\text{Me}})$ ; and (c)  $\text{Cu}_4\text{I}_4(\text{NHC}^{\text{Py}_2})_2$ .

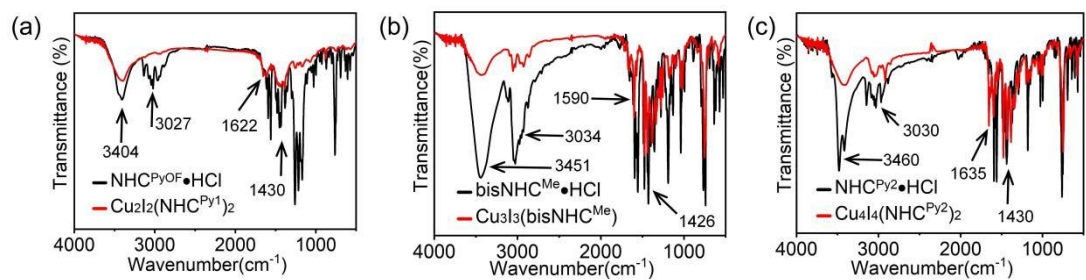

**Figure S15.** Fourier transform infrared spectroscopy (FTIR) of (a)  $\text{Cu}_2\text{I}_2(\text{NHCPyOF})_2$ ; (b)  $\text{Cu}_3\text{I}_3(\text{bisNHC}^{\text{Me}})$ ; and (c)  $\text{Cu}_4\text{I}_4(\text{NHCPy}_2)_2$ .

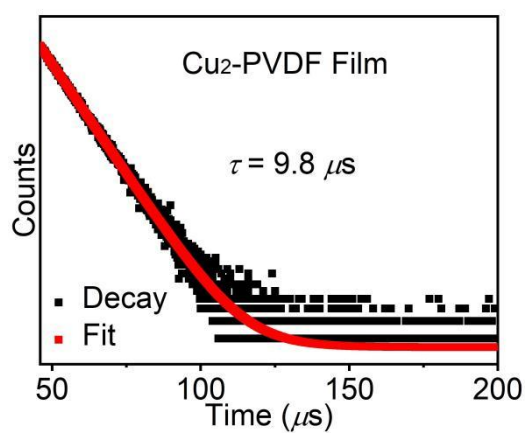

**Figure S16.** Lifetime for  $\text{Cu}_2$ -PVDF film at room temperature.

**Table S1.** Major contributions of frontiers molecular orbitals for calculated UV-Vis spectrum of  $\text{Cu}_2\text{I}_2(\text{NHC}^{\text{PyOF}})_2$ .

| Wavelength | Major Contributions                                   |
|------------|-------------------------------------------------------|
| 375 nm     | <p>HOMO → LUMO (95%)</p>                              |
| 330 nm     | <p>HOMO → LUMO+2 (83%)</p>                            |
| 291 nm     | <p>HOMO-3 → LUMO (51%)      HOMO-1 → LUMO+3 (33%)</p> |
| 277 nm     | <p>HOMO-4 → LUMO (51%)      HOMO → LUMO+5 (23%)</p>   |
| 260 nm     | <p>HOMO-3 → LUMO+2 (77%)</p>                          |

**Table S2.** Major contributions of frontiers molecular orbitals for calculated UV-Vis spectrum of  $\text{Cu}_3\text{I}_3(\text{bisNHC}^{\text{Me}})$ .

| Wavelength | Major Contributions                                                                                                                         |
|------------|---------------------------------------------------------------------------------------------------------------------------------------------|
| 450 nm     | 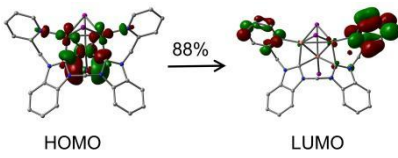 <p>HOMO → LUMO (88%)</p>                                 |
| 383 nm     |  <p>HOMO-1 → LUMO (82%)</p>                               |
| 343 nm     |  <p>HOMO-3 → LUMO (57%)<br/>HOMO-2 → LUMO (32%)</p>       |
| 308 nm     |  <p>HOMO-3 → LUMO+3 (30%)<br/>HOMO-4 → LUMO+3 (19%)</p>  |
| 285 nm     |  <p>HOMO-5 → LUMO+3 (42%)<br/>HOMO-6 → LUMO+2 (13%)</p> |

**Table S3.** Major contributions of frontiers molecular orbitals for calculated UV-Vis spectrum of  $\text{Cu}_4\text{I}_4(\text{NHC}^{\text{Py}^2})_2$ .

| Wavelength | Major Contributions                                                                  |
|------------|--------------------------------------------------------------------------------------|
| 413 nm     | 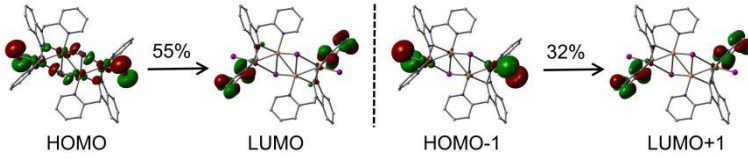   |
| 366 nm     |    |
|            |    |
| 338 nm     |   |
| 296 nm     |  |
| 270 nm     |  |

**Table S4.** Crystal data and structure refinement for **Cu<sub>2</sub>I<sub>2</sub>(NHC<sup>PyOF</sup>)<sub>2</sub>**.

| <b>Cu<sub>2</sub>I<sub>2</sub>(NHC<sup>PyOF</sup>)<sub>2</sub></b> |                                                                                                             |
|--------------------------------------------------------------------|-------------------------------------------------------------------------------------------------------------|
| Empirical formula                                                  | C <sub>46</sub> H <sub>42</sub> Cu <sub>2</sub> F <sub>6</sub> I <sub>2</sub> N <sub>6</sub> O <sub>3</sub> |
| Formula weight                                                     | 1221.73                                                                                                     |
| Temperature/K                                                      | 200.00(10)                                                                                                  |
| Crystal system                                                     | triclinic                                                                                                   |
| Space group                                                        | P-1                                                                                                         |
| a/Å                                                                | 10.2327(5)                                                                                                  |
| b/Å                                                                | 10.4416(5)                                                                                                  |
| c/Å                                                                | 24.6057(12)                                                                                                 |
| α/°                                                                | 91.419(4)                                                                                                   |
| β/°                                                                | 100.077(4)                                                                                                  |
| γ/°                                                                | 110.999(4)                                                                                                  |
| Volume/Å <sup>3</sup>                                              | 2405.6(2)                                                                                                   |
| Z                                                                  | 2                                                                                                           |
| ρ <sub>calc</sub> /cm <sup>3</sup>                                 | 1.687                                                                                                       |
| μ/mm <sup>-1</sup>                                                 | 11.759                                                                                                      |
| F(000)                                                             | 1204.0                                                                                                      |
| Crystal size/mm <sup>3</sup>                                       | 0.1 × 0.1 × 0.1                                                                                             |
| Radiation                                                          | Cu Kα (λ = 1.54184)                                                                                         |
| 2θ range for data collection/°                                     | 7.332 to 130.168                                                                                            |
| Index ranges                                                       | -12 ≤ h ≤ 12, -12 ≤ k ≤ 7, -28 ≤ l ≤ 20                                                                     |
| Reflections collected                                              | 12071                                                                                                       |
| Independent reflections                                            | 6934 [R <sub>int</sub> = 0.0610, R <sub>sigma</sub> = 0.0832]                                               |
| Data/restraints/parameters                                         | 6934/52/540                                                                                                 |
| Goodness-of-fit on F <sup>2</sup>                                  | 1.076                                                                                                       |
| Final R indexes [I ≥ 2σ (I)]                                       | R <sub>1</sub> = 0.0865, wR <sub>2</sub> = 0.2424                                                           |
| Final R indexes [all data]                                         | R <sub>1</sub> = 0.1138, wR <sub>2</sub> = 0.2575                                                           |
| Largest diff. peak/hole / e Å <sup>-3</sup>                        | 2.38/-1.06                                                                                                  |
| CCDC                                                               | 2348356                                                                                                     |

**Table S5.** Selected bond lengths in  $\text{Cu}_2\text{I}_2(\text{NHC}^{\text{PyOF}})_2$ .

| Atom | Atom | Length/Å  | Atom | Atom | Length/Å  |
|------|------|-----------|------|------|-----------|
| I1   | Cu1  | 2.586(2)  | C16  | C18  | 1.39(2)   |
| I2   | Cu2  | 2.622(2)  | F3   | C17  | 1.30(3)   |
| Cu1  | Cu11 | 2.483(4)  | O2   | C43  | 1.405(19) |
| Cu1  | N31  | 2.069(12) | O2   | C11  | 1.417(14) |
| Cu1  | C41  | 2.419(6)  | C20  | C28  | 1.529(13) |
| Cu1  | C4   | 1.989(7)  | C22  | C38  | 1.523(18) |
| Cu2  | Cu22 | 2.541(4)  | C22  | C40  | 1.39(2)   |
| Cu2  | C82  | 2.456(4)  | C24  | C40  | 1.37(2)   |
| Cu2  | C8   | 1.976(6)  | C24  | C44  | 1.36(3)   |
| Cu2  | N52  | 2.062(11) | C26  | C28  | 1.39      |
| N1   | C8   | 1.366(6)  | C26  | C36  | 1.39      |
| N1   | C20  | 1.465(13) | C28  | C30  | 1.39      |
| N1   | C13  | 1.363(2)  | C30  | C32  | 1.39      |
| O1   | C26  | 1.396(13) | C32  | C34  | 1.39      |
| O1   | C17  | 1.35(2)   | C34  | C36  | 1.39      |
| N4   | C6   | 1.441(14) | F2   | C17  | 1.38(3)   |
| N4   | C8   | 1.359(8)  | C42  | C44  | 1.37(2)   |
| N4   | C25  | 1.362(5)  | C46  | C23  | 1.39      |
| N6   | C4   | 1.349(9)  | C46  | C27  | 1.39      |
| N6   | C38  | 1.439(17) | C23  | C3   | 1.39      |
| N6   | C7   | 1.375(9)  | C3   | C25  | 1.39      |
| N3   | C22  | 1.369(18) | C25  | C13  | 1.39      |
| N3   | C42  | 1.333(17) | C13  | C27  | 1.39      |
| N2   | C1   | 1.458(15) | C7   | C29  | 1.39      |
| N2   | C4   | 1.338(15) | C7   | C33  | 1.39      |
| N2   | C33  | 1.369(6)  | C29  | C15  | 1.39      |
| O3   | C19  | 1.385(14) | C15  | C31  | 1.39      |
| O3   | C41  | 1.34(3)   | C31  | C2   | 1.39      |
| F1   | C41  | 1.30(3)   | C2   | C33  | 1.39      |
| F4   | C17  | 1.23(2)   | F5   | C41  | 1.32(3)   |
| C1   | C37  | 1.535(14) | C35  | C9   | 1.39      |
| F6   | C41  | 1.33(3)   | C35  | C5   | 1.39      |
| C6   | C12  | 1.488(17) | C9   | C37  | 1.39      |
| C10  | C12  | 1.402(19) | C37  | C19  | 1.39      |
| C10  | C18  | 1.39(2)   | C19  | C39  | 1.39      |
| C12  | N5   | 1.340(16) | C39  | C5   | 1.39      |
| N5   | C14  | 1.347(17) | C21  | C43  | 1.527(10) |
| C14  | C16  | 1.37(2)   | C11  | C45  | 1.530(10) |



**Table S6.** Crystal data and structure refinement for **Cu<sub>3</sub>I<sub>3</sub>(bisNHC<sup>Me</sup>)**.

| <b>Cu<sub>3</sub>I<sub>3</sub>(bisNHC<sup>Me</sup>)</b> |                                                                                 |
|---------------------------------------------------------|---------------------------------------------------------------------------------|
| Empirical formula                                       | C <sub>31</sub> H <sub>29</sub> Cu <sub>3</sub> I <sub>3</sub> N <sub>6</sub> O |
| Formula weight                                          | 1072.92                                                                         |
| Temperature/K                                           | 200.00                                                                          |
| Crystal system                                          | triclinic                                                                       |
| Space group                                             | P-1                                                                             |
| a/Å                                                     | 8.3978(3)                                                                       |
| b/Å                                                     | 11.9863(5)                                                                      |
| c/Å                                                     | 18.0621(7)                                                                      |
| α/°                                                     | 74.184(4)                                                                       |
| β/°                                                     | 86.836(3)                                                                       |
| γ/°                                                     | 77.971(3)                                                                       |
| Volume/Å <sup>3</sup>                                   | 1710.86(12)                                                                     |
| Z                                                       | 2                                                                               |
| ρ <sub>calc</sub> /g/cm <sup>3</sup>                    | 2.083                                                                           |
| μ/mm <sup>-1</sup>                                      | 23.691                                                                          |
| F(000)                                                  | 1022.0                                                                          |
| Crystal size/mm <sup>3</sup>                            | 0.06 × 0.06 × 0.05                                                              |
| Radiation                                               | Cu Kα (λ = 1.54184)                                                             |
| 2θ range for data collection/°                          | 7.826 to 147.164                                                                |
| Index ranges                                            | -7 ≤ h ≤ 10, -14 ≤ k ≤ 14, -22 ≤ l ≤ 21                                         |
| Reflections collected                                   | 16425                                                                           |
| Independent reflections                                 | 6635 [R <sub>int</sub> = 0.0639, R <sub>sigma</sub> = 0.0693]                   |
| Data/restraints/parameters                              | 6635/0/399                                                                      |
| Goodness-of-fit on F <sub>2</sub>                       | 1.096                                                                           |
| Final R indexes [I ≥ 2σ (I)]                            | R <sub>1</sub> = 0.0859, wR <sub>2</sub> = 0.2474                               |
| Final R indexes [all data]                              | R <sub>1</sub> = 0.0918, wR <sub>2</sub> = 0.2514                               |
| Largest diff. peak/hole / e Å <sup>-3</sup>             | 3.33/-2.26                                                                      |
| CCDC                                                    | 2269842                                                                         |

**Table S7.** Selected bond lengths in **Cu<sub>3</sub>I<sub>3</sub>(bisNHC<sup>Me</sup>)**.

| Atom | Atom | Length/Å  | Atom | Atom | Length/Å  |
|------|------|-----------|------|------|-----------|
| I1   | Cu3  | 2.664(2)  | N6   | C5   | 1.32(2)   |
| I1   | Cu2  | 2.839(2)  | N6   | C1   | 1.329(19) |
| I1   | Cu1  | 2.723(2)  | C5   | C6   | 1.53(2)   |
| I3   | Cu3  | 2.548(2)  | C5   | C4   | 1.39(2)   |
| I2   | Cu2  | 2.617(2)  | C13  | C8   | 1.402(18) |
| I2   | Cu1  | 2.576(2)  | C13  | C12  | 1.421(18) |
| Cu3  | Cu2  | 2.577(3)  | C8   | C9   | 1.39(2)   |
| Cu3  | Cu1  | 2.519(3)  | C9   | C10  | 1.40(2)   |
| Cu3  | C15  | 1.966(13) | C10  | C11  | 1.39(2)   |
| Cu3  | C7   | 2.317(12) | C11  | C12  | 1.35(2)   |
| Cu2  | Cu1  | 2.605(3)  | O1   | C28  | 1.19(2)   |
| Cu2  | N6   | 2.066(12) | C21  | C20  | 1.371(18) |
| Cu2  | C7   | 1.978(13) | C21  | C16  | 1.415(17) |
| Cu1  | N5   | 2.025(11) | C20  | C19  | 1.402(19) |
| Cu1  | C15  | 2.369(13) | C19  | C18  | 1.37(2)   |
| N2   | C13  | 1.379(17) | C18  | C17  | 1.38(2)   |
| N2   | C14  | 1.484(16) | C17  | C16  | 1.384(18) |
| N2   | C7   | 1.364(16) | C29  | C28  | 1.33(2)   |
| N3   | C16  | 1.384(16) | C29  | C31  | 1.46(3)   |
| N3   | C14  | 1.463(15) | C29  | C30  | 1.44(3)   |
| N3   | C15  | 1.365(15) | C22  | C23  | 1.51(2)   |
| N5   | C23  | 1.357(19) | C1   | C2   | 1.39(2)   |
| N5   | C27  | 1.30(2)   | C4   | C3   | 1.39(2)   |
| N1   | C8   | 1.395(17) | C23  | C24  | 1.35(2)   |
| N1   | C6   | 1.469(16) | C26  | C27  | 1.41(2)   |
| N1   | C7   | 1.331(17) | C26  | C25  | 1.37(3)   |
| N4   | C21  | 1.397(16) | C2   | C3   | 1.36(3)   |
| N4   | C22  | 1.457(15) | C24  | C25  | 1.43(3)   |
| N4   | C15  | 1.364(17) |      |      |           |

**Table S8.** Crystal data and structure refinement for **Cu<sub>4</sub>I<sub>4</sub>(NHC<sup>Py2</sup>)<sub>2</sub>**.

| <b>Cu<sub>4</sub>I<sub>4</sub>(NHC<sup>Py2</sup>)<sub>2</sub></b> |                                                                               |
|-------------------------------------------------------------------|-------------------------------------------------------------------------------|
| Empirical formula                                                 | C <sub>38</sub> H <sub>32</sub> Cu <sub>4</sub> I <sub>4</sub> N <sub>8</sub> |
| Formula weight                                                    | 1362.47                                                                       |
| Temperature/K                                                     | 200.00                                                                        |
| Crystal system                                                    | triclinic                                                                     |
| Space group                                                       | <i>P</i> -1                                                                   |
| <i>a</i> /Å                                                       | 8.9031(4)                                                                     |
| <i>b</i> /Å                                                       | 11.2513(5)                                                                    |
| <i>c</i> /Å                                                       | 12.7832(6)                                                                    |
| $\alpha$ /°                                                       | 105.145(4)                                                                    |
| $\beta$ /°                                                        | 100.155(4)                                                                    |
| $\gamma$ /°                                                       | 100.596(4)                                                                    |
| Volume/Å <sup>3</sup>                                             | 1180.51(10)                                                                   |
| <i>Z</i>                                                          | 1                                                                             |
| $\rho_{\text{calc}}/\text{cm}^3$                                  | 1.917                                                                         |
| $\mu/\text{mm}^{-1}$                                              | 22.829                                                                        |
| <i>F</i> (000)                                                    | 644.0                                                                         |
| Crystal size/mm <sup>3</sup>                                      | 0.03 × 0.02 × 0.02                                                            |
| Radiation                                                         | Cu K $\alpha$ ( $\lambda$ = 1.54184)                                          |
| 2 $\theta$ range for data collection/°                            | 8.39 to 148.316                                                               |
| Index ranges                                                      | -10 ≤ <i>h</i> ≤ 11, -13 ≤ <i>k</i> ≤ 13, -15 ≤ <i>l</i> ≤ 10                 |
| Reflections collected                                             | 11573                                                                         |
| Independent reflections                                           | 4558 [ <i>R</i> <sub>int</sub> = 0.0540, <i>R</i> <sub>sigma</sub> = 0.0624]  |
| Data/restraints/parameters                                        | 4558/92/244                                                                   |
| Goodness-of-fit on <i>F</i> <sub>2</sub>                          | 1.054                                                                         |
| Final <i>R</i> indexes [ <i>I</i> ≥ 2 $\sigma$ ( <i>I</i> )]      | <i>R</i> <sub>1</sub> = 0.0891, <i>wR</i> <sub>2</sub> = 0.2563               |
| Final <i>R</i> indexes [all data]                                 | <i>R</i> <sub>1</sub> = 0.1032, <i>wR</i> <sub>2</sub> = 0.2679               |
| Largest diff. peak/hole / e Å <sup>-3</sup>                       | 3.40/-2.86                                                                    |
| CCDC                                                              | 2270031                                                                       |

**Table S9.** Selected bond lengths in **Cu<sub>4</sub>I<sub>4</sub>(NHC<sup>Py2</sup>)<sub>2</sub>**.

| Atom | Atom | Length/Å  | Atom | Atom | Length/Å  |
|------|------|-----------|------|------|-----------|
| I2   | Cu2  | 2.640(2)  | N4   | C15  | 1.392(9)  |
| I2   | Cu21 | 2.643(2)  | C19  | C18  | 1.389(10) |
| I2   | Cu11 | 2.795(2)  | C18  | C17  | 1.389(10) |
| I1   | Cu1  | 2.559(2)  | C17  | C16  | 1.382(10) |
| Cu2  | Cu1  | 2.437(3)  | C16  | C15  | 1.382(9)  |
| Cu2  | N4   | 2.075(13) | C15  | C14  | 1.49(2)   |
| Cu2  | C7   | 2.028(13) | C5   | C6   | 1.51(2)   |
| Cu1  | N1   | 2.078(11) | C5   | C4   | 1.38(2)   |
| Cu1  | C7   | 2.077(13) | C11  | C10  | 1.391(9)  |
| N3   | C13  | 1.356(15) | C11  | C12  | 1.391(9)  |
| N3   | C7   | 1.351(17) | C10  | C9   | 1.390(9)  |
| N3   | C14  | 1.477(17) | C9   | C8   | 1.386(9)  |
| N2   | C8   | 1.381(16) | C8   | C13  | 1.390(9)  |
| N2   | C6   | 1.467(18) | C13  | C12  | 1.382(9)  |
| N2   | C7   | 1.373(18) | C1   | C2   | 1.383(10) |
| N1   | C5   | 1.384(9)  | C3   | C4   | 1.40(3)   |
| N1   | C1   | 1.402(10) | C3   | C2   | 1.37(3)   |
| N4   | C19  | 1.417(9)  |      |      |           |

## References

- (S1) X. Zhang, S. Gu, Q. Xia and W. Chen, New Structural Motifs of Silver and Gold Complexes of Pyridine-Functionalized Benzimidazolylidene Ligands. *J. Organomet. Chem.*, 2009, **694**, 2359-2367.
- (S2) M. C. Jahnke, T. Pape and F. E. Hahn, Synthesis and Catalytic Application of Palladium Complexes with Picoline-Functionalized Benzimidazolylidene Ligands. *Eur. J. Inorg. Chem.*, 2009, **2009**, 1960-1969.
- (S3) CrysAlis<sup>Pro</sup> Version 1.171.36.31. 2012. Agilent Technologies Inc. Santa Clara, CA, USA.
- (S4) G. M. Sheldrick, A Short History of SHELX. *Acta Cryst., A* 2007, **64**, 112-122.
- (S5) O. V. Dolomanov, L. J. Bourhis, R. J. Gildea, J. A. K. Howard and H. Puschmann, OLEX2: A Complete Structure Solution, Refinement and Analysis Program. *J. Appl. Cryst.*, 2009, **42**, 339-341.
- (S6) G. M. Sheldrick, Crystal Structure Refinement with SHELXL. *Acta Cryst. C* 2015, **71**, 3-8.
- (S7) M. J. Frisch, G.W. Trucks and H.B. Schlegel, Gaussian 16 (Revision A.03). 2016.
- (S8) (a) W. Humphrey, A. Dalke and K. Schulten, VMD: Visual Molecular Dynamics. *J. Molec. Graphics*, 1996, **14**, 33-38. (b) J. P. Perdew, K. Burke and M. Ernzerhof, Generalized Gradient Approximation Made Simple. *Phys. Rev. Lett.*, 1996, **77**, 3865-3868. (c) G. A. Petersson, A. Bennett, T. G. Tensfeldt, M. A. Al-Laham, W. A. Shirley and J. Mantzaris, A Complete Basis Set Model Chemistry. I. The Total Energies of Closed-Shell Atoms and Hydrides of the First-Row Elements. *J. Chem. Phys.*, 1988, **89**, 2193-2218. (d) G. A. Petersson and M. A. Al-Laham, A Complete Basis Set Model Chemistry. II. Open-Shell Systems and the Total Energies of the First-Row Atoms. *J. Chem. Phys.*, 1991, **94**, 6081-6090. (e) P. Fuentealba, H. Preuss, H. Stoll and L. Von Szentpály, A Proper Account of Core-Polarization with Pseudopotentials: Single Valence-Electron Alkali Compounds. *Chem. Phys. Lett.*, 1982, **89**, 418-422.
- (S9) T. Lu and F. Chen, Multiwfn: A Multifunctional Wavefunction Analyzer. *J. Comput. Chem.*, 2012, **33**, 580-592.
